# Supplementary material for: Very large magnetoresistive graphene disk with negative permittivity
Source: Royal Society of Chemistry journal article supplement (doi:10.1039/c1nr11101a), 2011-11-08
Supplement: c1nr11101a.pdf [file c1nr11101a.pdf]

## Supporting Materials

### Giant Magnetoresistive Graphene with Negative Permittivity

Jiahua Zhu,<sup>a</sup> Suying Wei,<sup>b,\*</sup> Neel Haldolaarachchige,<sup>c</sup> Jun He,<sup>d</sup> David P. Young,<sup>c</sup> and Zhanhu Guo<sup>\*,a</sup>

<sup>a</sup>Integrated Composites Laboratory (ICL)  
Dan F Smith Department of Chemical Engineering  
Lamar University, Beaumont, Texas 77710, USA  
Tel: (409) 880-7654; E-mail: [zhanhu.guo@lamar.edu](mailto:zhanhu.guo@lamar.edu)

<sup>b</sup>Department of Chemistry and Biochemistry  
Lamar University, Beaumont, Texas 77710, USA  
Tel: (409) 880-7976; E-mail: [suying.wei@lamar.edu](mailto:suying.wei@lamar.edu)

<sup>c</sup>Department of Physics and Astronomy  
Louisiana State University, Baton Rouge, Louisiana 70803, USA

<sup>d</sup>National Center for Nanoscience and Technology, Beijing 100190, China

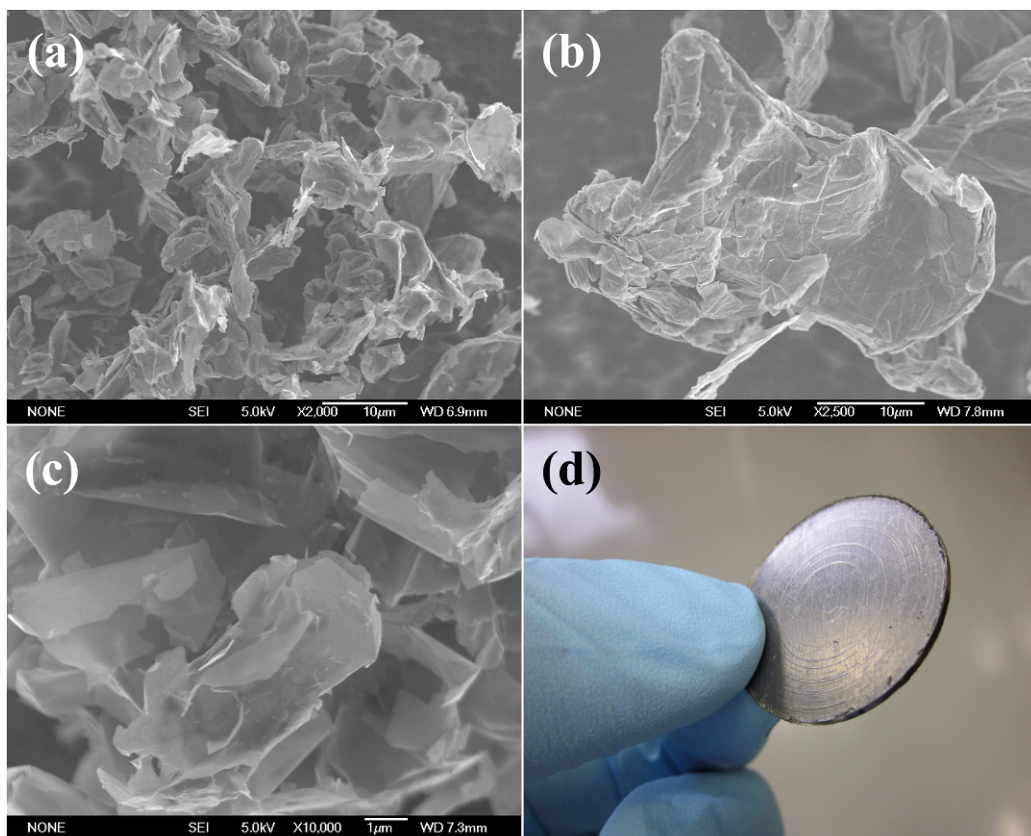

**Figure S1.** SEM images of (a) Gra-10, (b) Gra-40, (c) Gra-P and (d) photograph of the sample dimension.

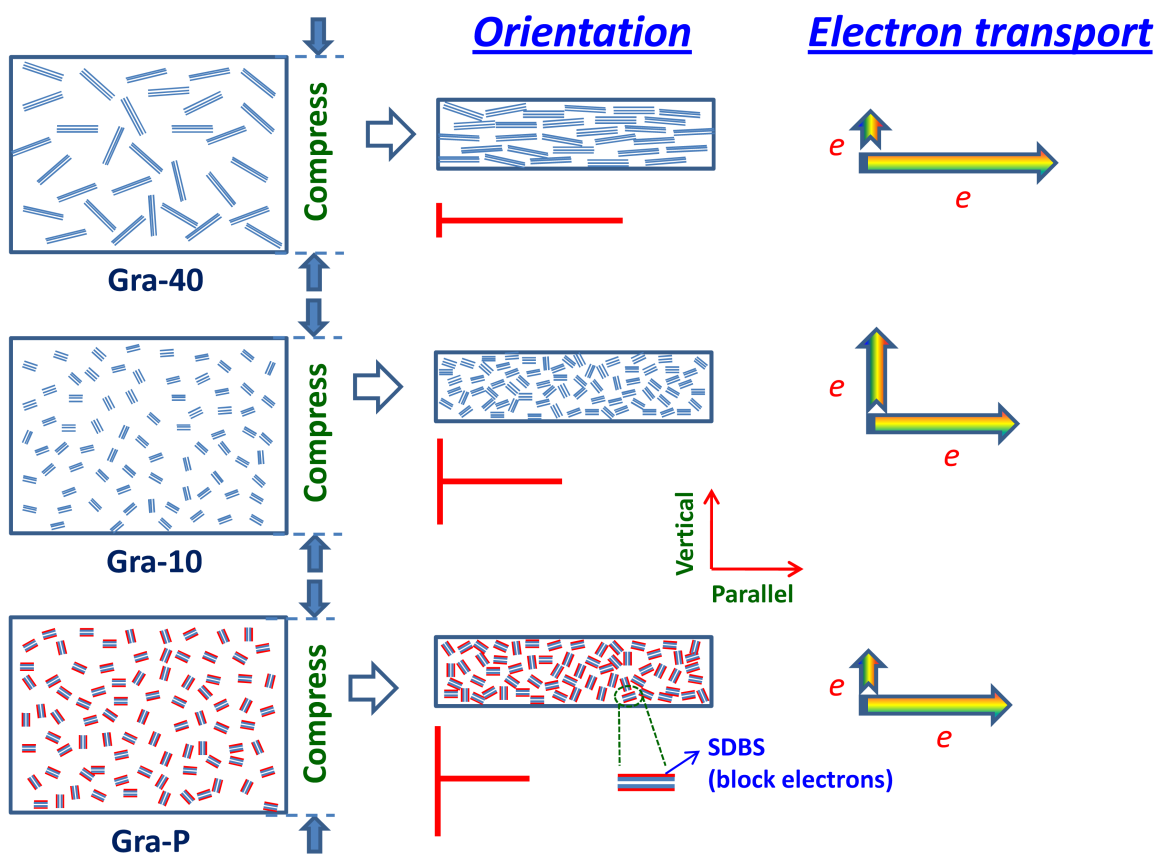

**Figure S2.** The different-sized graphene sheets orientation after compression and its electron transportation along parallel and vertical directions. (SDBS is the surfactant used during fabrication)
